# Supplementary material
Source: PubMed Central journal article supplement (PMC4435055)
Supplement: supp_112.106856_biolreprod.112.106856-1.pdf [file supp_112.106856_biolreprod.112.106856-1.pdf]

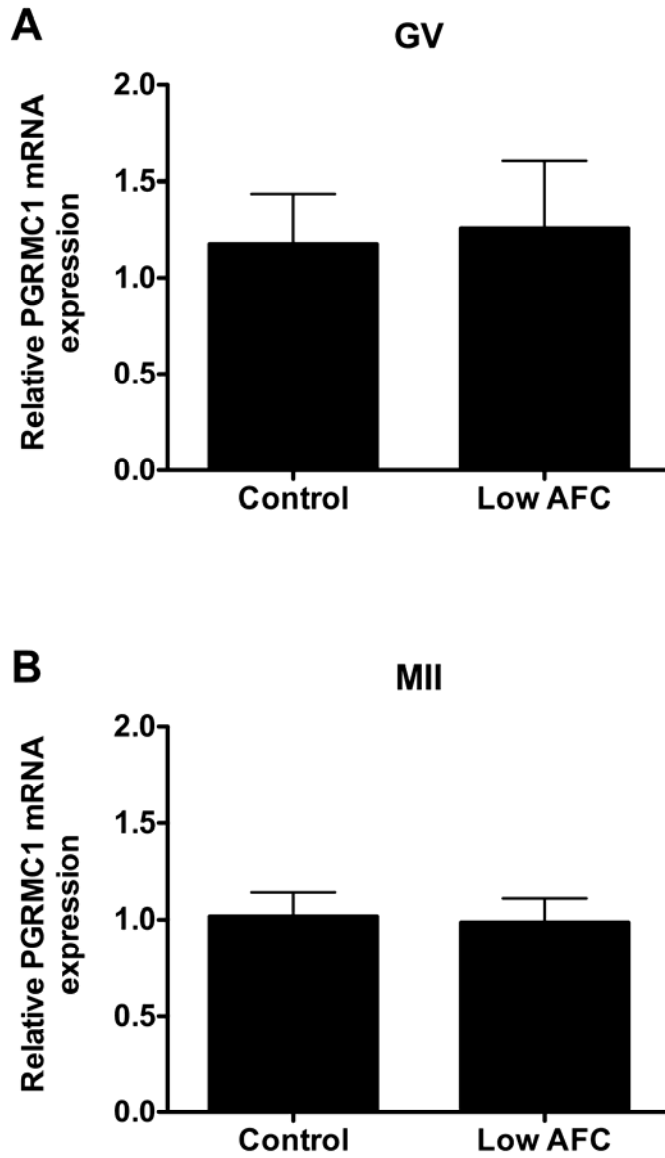

**Supplemental Figure S1.** *Pgrmc1* mRNA expression levels in Control and Low AFC oocytes. Relative *Pgrmc1* mRNA expression in GV stage (A) and MII stage (B) Control and Low AFC oocytes. Data were calculated by the  $\Delta$ CT using  $\beta$ -actin as internal standard.
